# Supplementary material for: Optimal cutoff value of the Japanese shortened version of the Pediatric Symptom Checklist (PSC) Youth Self-Report
Source: Research Square preprint supplement (doi:10.21203/rs.3.rs-8488914/v1), 2026-02-02
Supplement: Supplementary file 1 [file e383afcb6eecdb5dcbe15c3b.xlsx]

## Sheet: 患者（小中）
ID	Age	Gender	School	Disgnosis	不登校	OD	IBS/便秘	ASD	ADHD	MR(境界含む)	睡眠障害	肥満	摂食障害	不安障害・強迫性障害	1	2	3	4	5	6	7	8	9	10	11	12	13	14	15	16	17	PSCScore	Commentｓ	QTA30 Full	QTA30 physical syn	QTA30 depression	QTA30 self-efficasy	QTA30 anxiety	QTA30 family fun	CMAS スコア	CMAS 程度	GHQ TMD
1	13	1	2	ASD Migraine OD SR	1	1		1							0	0	0	0	0	0	0	0	0	0	0	0	0	0	1	0	0	1	holder
2	13	1	2	ASD SR	1			1							0	0	0	0	0	0	1	0	0	0	0	0	0	0	0	0	0	1	holder
3	11	1	1	ASD ED OCD				1					1	1	0	0	1	1	0	0	1	0	0	1	1	0	0	0	2	0	1	8
4	11	1	1	ADHD					1						2	0	0	0	2	2	2	2	1	1	0	2	2	2	0	1	2	21
5	14	1	2	OD OCD ADHD SR	1	1			1					1	2	1	1	1	1	1	0	0	2	0	1	1	1	0	2	1	1	16
6	14	1	2	ADHD BorderlineMR					1	1					1	0	2	0	1	0	2	1	0	0	0	1	1	1	1	0	2	13
7	11	2	1	ADHD					1						1	2	1	2	1	2	1	1	2	1	2	2	1	1	2	1	2	25
8	14	2	2	Tic SR	1										0	1	1	0	0	0	2	0	1	0	0	0	0	0	1	0	2	8
9	14	1	2	OR SR	1	1									1	2	0	1	0	1	1	0	1	0	2	0	1	0	2	0	2	14
10	14	2	2	OD SR Neurosis	1	1								1	0	0	0	0	0	0	0	0	1	0	0	0	0	0	0	0	0	1	holder
11	11	1	1	ASD SR Obesity	1			1				1			0	0	1	1	1	1	1	0	2	0	1	2	0	1	1	0	1	13
12	15	2	2	睡眠障害 SR 非OD	1						1				0	1	1	0	0	2	0	2	0	0	1	1	0	1	2	0	1	12
13	11	1	1	ASD ADD				1	1						0	0	1	0	0	0	1	0	1	0	1	0	1	0	1	0	2	8
14	12	1	1	SR 睡眠障害	1						1				1	1	2	1	2	1	2	0	1	0	1	1	2	0	1	0	2	18
15	13	1	2	MR ADHD OCD					1	1				1	0	0	2	1	1	1	2	2	0	0	1	1	2	2	2	0	2	19
16	11	1	1	ADHD					1						0	2	1	0	0	1	0	0	2	0	2	1	0	0	1	0	2	12
17	12	1	2	OD SR	1	1									2	1	2	1	0	2	0	1	2	0	2	1	1	1	2	1	1	20
18	12	2	1	OD SR ADD	1	1			1						0	0	1	0	0	0	0	0	1	0	0	0	0	0	2	0	1	5	holder
19	13	2	2	ED 頭痛 ASD SR 緘黙 HVS	1			1					1		0	0	0	0	0	0	0	0	0	0	0	0	0	0	1	0	0	1	holder
20	14	2	2	OD SR ASD	1	1		1							0	0	2	0	0	0	0	0	2	0	0	0	1	0	2	1	2	10
21	11	1	1	IBS OD SR 頭痛 肥満	1	1	1					1			2	1	0	1	1	2	1	1	1	1	1	1	1	1	2	0	1	18
22	14	2	2	OD		1									0	0	1	0	0	0	0	0	2	0	1	0	0	0	2	0	0	6
23	12	2	2	ED SR	1								1		0	1	1	0	0	1	1	0	2	0	1	0	2	0	1	0	1	11
24	13	1	2	OD SR	1	1									0	1	1	0	0	0	1	0	1	1	1	1	0	0	1	0	1	9
25	14	2	2	OD SR	1	1									1	1	2	0	1	2	2	0	1	1	1	1	0	0	2	0	2	17
26	15	2	2	睡眠障害 SR 非OD	1						1				1	2	2	0	0	2	1	1	2	0	2	0	1	0	2	0	1	17
27	13	1	2	OD ADHD		1			1						1	0	1	1	0	0	1	2	0	0	1	0	1	1	1	1	1	12
28	11	1	1	肥満 ASD				1				1			0	1	0	0	1	2	0	1	0	1	0	0	1	0	2	1	2	12
29	15	2	2	OD ED SR	1	1							1		1	0	0	0	0	0	2	0	0	0	0	0	2	0	0	0	2	7
30	13	1	2	ADD	1	1									2	1	2	1	1	1	1	1	1	1	1	0	1	1	1	1	2	19
31	15	2	2	OD SR PMS	1	1									1	1	1	0	0	1	1	0	1	0	0	0	0	0	0	0	0	6
32	14	2	2	OD 睡眠障害 SR	1	1					1				1	1	1	1	0	0	0	0	1	0	1	0	2	0	1	0	2	11
33	15	1	2	SR 便秘 睡眠障害ASD	1		1	1			1				0	1	2	2	1	2	2	0	1	0	2	0	0	0	2	0	2	17
34	12	2	2	OD ASD OCD MR		1		1		1				1	0	0	0	0	0	0	1	1	0	0	0	0	0	0	1	0	1	4	holder
35	12	1	2	ASD 解離				1							1	1	2	1	1	2	1	1	2	1	1	1	1	0	1	0	2	19
36	14	1	2	IBS SR	1		1								0	0	0	0	0	0	1	0	1	0	0	1	0	0	2	0	1	6	DD tendency	37	21	0	9	7
37	14	1	2	OD SR	1	1									1	0	1	0	0	0	1	0	0	0	0	0	0	1	1	1	1	7	DD tendency	56	45	1	5	5
38	13	1	2	OD SR	1	1									1	1	1	0	1	1	2	0	2	0	1	1	1	1	2	0	1	16		27	9	3	10	5
39	13	1	2	OD SR	1	1									1	0	2	0	1	0	1	1	0	0	0	1	2	0	0	0	2	11		54	42	0	6	6
40	14	1	2	OD ADHD SR	1	1			1						1	1	1	0	0	0	1	0	0	0	0	0	2	0	1	0	1	8		42	33	1	3	5
41	14	1	2	OD SR	1	1										0	0	1	1	0	0	1	1	1	0	1	0	1	1	0	2	10		40	24	1	8	7
42	15	1	2	OD SR	1	1									0	0	1	0	0	0	0	0	0	0	0	0	0	0	2	0	0	3	DD tendency	48	30	2	11	5
43	13	2	2	OD OCD 不安障害 SR	1	1								1	0	2	2	2	1	1	1	2	1	1	1	2	1	0	1	0	1	19		42	24	4	6	8
44	15	1	2	OD SR	1	1									1	1	0	2	1	2	0	1	0	2	2	2	1	1	0	2	0	18		66	42	5	8	11
45	14	1	2	OD SR	1	1									1	0	2	0	1	0	0	0	0	0	0	0	2	0	1	0	2	9		40	30	0	7	3
46	12	2	2	ＯＤ ＳＲ	1	1									1	1	2	1	1	1	2	0	1	1	1	0	0	0	1	0	1	14		63	39	5	9	10
47	11	2	1	OD ＳＲ	1	1									1	2	0	0	1	2	2	1	2	1	2	0	2	0	1	0	2	19		58	27	6	13	12
48	15	2	2	ODSR	1	1									1	1	2	0	1	1	1	1	2	1	1	0	1	1	1	0	0	15		43	21	5	11	6
49	12	2	2	ED									1		2	2	2	2	1	1	2	0	2	1	2	2	2	2	2	1	2	28		85	54	6	13	12
50	13	2	2	SR	1										1	0	1	1	0	0	1	2	1	1	1	0	0	1	2	0	1	13
51	13	1	2	OD/SR/deconditioning	1	1									0	0	1	0	1	1	1	1	0	1	1	1	0	0	1	0	1	10		44	57	6	17	10	4	9	2
52	14	2	2	OD(POTS)		1									1	1	2	0	1	1	2	0	2	1	2	1	0	0	2	0	2	18		62	63	11	20	14	6	28	4	26
54	13	1	2	OD tendency/deconditioning		1									0	0	2	0	0	0	0	1	2	0	0	2	0	1	2	0	2	12		53	66	7	14	12	2	25	4	54
55	13	2	2	RAP IBS			1								1	1	2	0	0	2	1	0	2	0	1	1	1	1	2	0	1	16		40	48	9	16	13	2	31	5	33
56	14	2	2	OD(POTS)/sleeping dis		1					1				0	1	1	1	1	1	1	1	1	1	1	1	1	1	1	0	1	15		47	57	9	15	12	3	11	2	8
57	13	1	2	Tic/SR/ASD and OD tendency	1	1		1							1	0	1	0	1	0	0	1	0	1	0	0	1	1	0	0	1	8		5	27	5	9	8	2	1	1	3
58	14	1	2	Obesity/SR	1							1			1	1	0	1	2	0	2	1	1	0	2	0	2	0	1	0	2	16		65	69	12	18	12	3	22	4	49
59	15	2	2	OD/OCD/sleeping dis/too anxiety		1					1			1	0	2	1	0	1	2	1	1	2	1	1	0	0	1	2	0	1	16		71	75	9	18	15	2	36	5	51
60	14	2	2	OD tendency/SR/deconditioning	1	1									0	1	2	1	1	1	2	0	1	1	2	1	1	0	2	0	2	18		34	48	8	15	9	3	17	3	12
61	13	2	2	OD/SR	1	1									0	0	1	0	1	0	1	1	1	1	0	0	0	0	2	0	1	9		22	42	5	10	11	2	17	3	12
62	13	1	2	IBS/SR/DD	1		1								1	1	2	1	2	1	2	1	1	1	1	1	1	1	1	0	2	20		56	63	8	20	11	4	11	2	35
63	11	2	1	OD/deconditioning		1									1	0	0	0	0	0	2	1	1	0	0	1	1	1	0	0	2	10	reject	39	57	5	13	10	2	17	3	3
64	12	1	1	IBS/SR/ADHD	1		1		1						2	2	1	1	1	0	2	2	1	1	0	1	2	1	1	1	2	19		29	39	8	16	12	2	15	3	30
65	12	2	2	SR/Migrane	1										0	1	1	0	0	2	0	0	1	0	1	0	0	0	2	0	0	8		55	54	11	23	13	6	29	5	52
67	13	1	2	FD/SR?Anemia OD Border	1	1				1					1	1	1	0	0	0	1	0	0	0	1	0	1	0	2	0	1	9	border	53	69	6	15	9	2	21	4	20
70	14	2	2	SR 便秘	1		1								1	1	2	0	1	2	1	0	2	1	2	0	0	1	2	0	1	17		67	69	10	18	16	3	34	5	42
71	13	1	2	ADHD ASD OD SR	1	1		1	1						1	1	2	1	2	1	2	0	2	2	1	2	2	2	1	0	2	24		31	36	9	19	13	3	17	3	38
72	13	2	2	睡眠障害 頭痛 OD		1					1				2	1	1	2	2	1	2	1	2	1	2	0	1	1	2	0	2	23		70	75	14	10	17	2	39	5	71
73	14	1	2	OD SR	1	1									0	0	1	0	1	0	0	0	1	2	1	2	1	1	1	0	1	12		69	72	8	18	17	3	16	3	18
74	14	2	2	OD SR 便秘	1	1	1								1	1	2	0	1	1	2	1	2	1	1	1	1	1	1	0	2	19		66	75	10	15	12	4	28	4	51
75	13	2	2	SR	1										1	2	2	0	1	1	2	0	1	0	2	1	0	0	2	0	1	16		67	66	12	19	16	6	28	4	35
76	14	2	2	SR IBS OD	1	1	1								2	1	2	2	1	2	2	1	2	1	2	2	0	1	2	0	2	25		77	69	14	23	17	2	33	5	53
77	13	2	2	OD SR 睡眠障害	1	1					1				1	2	2	1	2	1	2	1	2	1	2	0	0	0	1	1	2	21		70	62	14	23	17	4	29	5	66
78	11	2	1	OD		1									1	0	0	1	1	0	2	0	0	1	1	0	1	0	0	0	1	9		50	66	7	13	10	2	15	3	2

## Sheet: 患者（中のみ）
ID	Age	Gender	School	Disgnosis	1	2	3	4	5	6	7	8	9	10	11	12	13	14	15	16	17	PSCScore	Commentｓ	QTA30 Full	QTA30 physical syn	QTA30 depression	QTA30 self-efficasy	QTA30 anxiety	QTA30 family fun	GHQ
1	13	1	2		0	0	0	0	0	0	0	0	0	0	0	0	0	0	1	0	0	1	holder
2	13	1	2		0	0	0	0	0	0	1	0	0	0	0	0	0	0	0	0	0	1	holder
5	14	1	2		2	1	1	1	1	1	0	0	2	0	1	1	1	0	2	1	1	16
6	14	1	2		1	0	2	0	1	0	2	1	0	0	0	1	1	1	1	0	2	13
8	14	2	2		0	1	1	0	0	0	2	0	1	0	0	0	0	0	1	0	2	8
9	14	1	2		1	2	0	1	0	1	1	0	1	0	2	0	1	0	2	0	2	14
10	14	2	2		0	0	0	0	0	0	0	0	1	0	0	0	0	0	0	0	0	1	holder
12	15	2	2		0	1	1	0	0	2	0	2	0	0	1	1	0	1	2	0	1	12
15	13	1	2		0	0	2	1	1	1	2	2	0	0	1	1	2	2	2	0	2	19
17	12	1	2		2	1	2	1	0	2	0	1	2	0	2	1	1	1	2	1	1	20
19	13	2	2		0	0	0	0	0	0	0	0	0	0	0	0	0	0	1	0	0	1	holder
20	14	2	2		0	0	2	0	0	0	0	0	2	0	0	0	1	0	2	1	2	10
22	14	2	2		0	0	1	0	0	0	0	0	2	0	1	0	0	0	2	0	0	6
23	12	2	2		0	1	1	0	0	1	1	0	2	0	1	0	2	0	1	0	1	11
24	13	1	2		0	1	1	0	0	0	1	0	1	1	1	1	0	0	1	0	1	9
25	14	2	2		1	1	2	0	1	2	2	0	1	1	1	1	0	0	2	0	2	17
26	15	2	2		1	2	2	0	0	2	1	1	2	0	2	0	1	0	2	0	1	17
27	13	1	2		1	0	1	1	0	0	1	2	0	0	1	0	1	1	1	1	1	12
29	15	2	2		1	0	0	0	0	0	2	0	0	0	0	0	2	0	0	0	2	7
30	13	1	2		2	1	2	1	1	1	1	1	1	1	1	0	1	1	1	1	2	19
31	15	2	2		1	1	1	0	0	1	1	0	1	0	0	0	0	0	0	0	0	6
32	14	2	2		1	1	1	1	0	0	0	0	1	0	1	0	2	0	1	0	2	11
33	15	1	2		0	1	2	2	1	2	2	0	1	0	2	0	0	0	2	0	2	17
34	12	2	2		0	0	0	0	0	0	1	1	0	0	0	0	0	0	1	0	1	4	holder
35	12	1	2		1	1	2	1	1	2	1	1	2	1	1	1	1	0	1	0	2	19
36	14	1	2	IBS	0	0	0	0	0	0	1	0	1	0	0	1	0	0	2	0	1	6	DD tendency	37	21	0	9	7
37	14	1	2	OD	1	0	1	0	0	0	1	0	0	0	0	0	0	1	1	1	1	7	DD tendency	56	45	1	5	5
38	13	1	2	OD	1	1	1	0	1	1	2	0	2	0	1	1	1	1	2	0	1	16		27	9	3	10	5
39	13	1	2	OD	1	0	2	0	1	0	1	1	0	0	0	1	2	0	0	0	2	11		54	42	0	6	6
40	14	1	2	OD ADHD	1	1	1	0	0	0	1	0	0	0	0	0	2	0	1	0	1	8		42	33	1	3	5
41	14	1	2	OD		0	0	1	1	0	0	1	1	1	0	1	0	1	1	0	2	10		40	24	1	8	7
42	15	1	2	OD	0	0	1	0	0	0	0	0	0	0	0	0	0	0	2	0	0	3	DD tendency	48	30	2	11	5
43	13	2	2	OD OCD Anxiety	0	2	2	2	1	1	1	2	1	1	1	2	1	0	1	0	1	19		42	24	4	6	8
44	15	1	2	OD	1	1	0	2	1	2	0	1	0	2	2	2	1	1	0	2	0	18		66	42	5	8	11
45	14	1	2	OD	1	0	2	0	1	0	0	0	0	0	0	0	2	0	1	0	2	9		40	30	0	7	3
46	12	2	2	OD	1	1	2	1	1	1	2	0	1	1	1	0	0	0	1	0	1	14		63	39	5	9	10
48	15	2	2	OD	1	1	2	0	1	1	1	1	2	1	1	0	1	1	1	0	0	15		43	21	5	11	6
49	12	2	2	ED	2	2	2	2	1	1	2	0	2	1	2	2	2	2	2	1	2	28		85	54	6	13	12
50	13	2	2	SR	1	0	1	1	0	0	1	2	1	1	1	0	0	1	2	0	1	13
51	13	1	2	OD/SR/deconditioning	0	0	1	0	1	1	1	1	0	1	1	1	0	0	1	0	1	10		44	57	6	17	10	4
52	14	2	2	OD(POTS)	1	1	2	0	1	1	2	0	2	1	2	1	0	0	2	0	2	18		62	63	11	20	14	6	26
54	13	1	2	OD tendency/deconditioning	0	0	2	0	0	0	0	1	2	0	0	2	0	1	2	0	2	12		53	66	7	14	12	2	54
55	13	2	2	RAP IBS	1	1	2	0	0	2	1	0	2	0	1	1	1	1	2	0	1	16		40	48	9	16	13	2	33
56	14	2	2	OD(POTS)/sleeping dis	0	1	1	1	1	1	1	1	1	1	1	1	1	1	1	0	1	15		47	57	9	15	12	3	8
57	13	1	2	Tic/SR/ASD and OD tendency	1	0	1	0	1	0	0	1	0	1	0	0	1	1	0	0	1	8		5	27	5	9	8	2	3
58	14	1	2	Obesity/SR	1	1	0	1	2	0	2	1	1	0	2	0	2	0	1	0	2	16		65	69	12	18	12	3	49
59	15	2	2	OD/OCD/sleeping dis/too anxiety	0	2	1	0	1	2	1	1	2	1	1	0	0	1	2	0	1	16		71	75	9	18	15	2	51
60	14	2	2	OD tendency/SR/deconditioning	0	1	2	1	1	1	2	0	1	1	2	1	1	0	2	0	2	18		34	48	8	15	9	3	12
61	13	2	2	OD/SR	0	0	1	0	1	0	1	1	1	1	0	0	0	0	2	0	1	9		22	42	5	10	11	2	12
62	13	1	2	IBS/SR/DD	1	1	2	1	2	1	2	1	1	1	1	1	1	1	1	0	2	20		56	63	8	20	11	4	35
65	12	2	2	SR/Migrane	0	1	1	0	0	2	0	0	1	0	1	0	0	0	2	0	0	8		55	54	11	23	13	6	52
67	13	1	2	FD/SR?Anemia	1	1	1	0	0	0	1	0	0	0	1	0	1	0	2	0	1	9		53	69	6	15	9	2	20
70	14	2	2	SR 便秘	1	1	2	0	1	2	1	0	2	1	2	0	0	1	2	0	1	17								42
71	13	1	2	ADHD ASD OD SR	1	1	2	1	2	1	2	0	2	2	1	2	2	2	1	0	2	24								38
72	13	2	2	睡眠障害 頭痛 OD	2	1	1	2	2	1	2	1	2	1	2	0	1	1	2	0	2	23								71
73	14	1	2	OD SR	0	0	1	0	1	0	0	0	1	2	1	2	1	1	1	0	1	12								18
74	14	2	2	OD SR 便秘	1	1	2	0	1	1	2	1	2	1	1	1	1	1	1	0	2	19								51
75	13	2	2	SR	1	2	2	0	1	1	2	0	1	0	2	1	0	0	2	0	1	16								35
76	14	2	2	SR IBS OD	2	1	2	2	1	2	2	1	2	1	2	2	0	1	2	0	2	25								53
77	13	2	2	OD SR 睡眠障害	1	2	2	1	2	1	2	1	2	1	2	0	0	0	1	1	2	21								66

## Sheet: 患者(中)（外れ値省き）
ID	Age	Gender	School	Disgnosis	1	2	3	4	5	6	7	8	9	10	11	12	13	14	15	16	17	PSCScore	Commentｓ	QTA30 Full	QTA30 physical syn	QTA30 depression	QTA30 self-efficasy	QTA30 anxiety	QTA30 family fun	GHQ
5	14	1	2		2	1	1	1	1	1	0	0	2	0	1	1	1	0	2	1	1	16
6	14	1	2		1	0	2	0	1	0	2	1	0	0	0	1	1	1	1	0	2	13
8	14	2	2		0	1	1	0	0	0	2	0	1	0	0	0	0	0	1	0	2	8
9	14	1	2		1	2	0	1	0	1	1	0	1	0	2	0	1	0	2	0	2	14
12	15	2	2		0	1	1	0	0	2	0	2	0	0	1	1	0	1	2	0	1	12
15	13	1	2		0	0	2	1	1	1	2	2	0	0	1	1	2	2	2	0	2	19
17	12	1	2		2	1	2	1	0	2	0	1	2	0	2	1	1	1	2	1	1	20
20	14	2	2		0	0	2	0	0	0	0	0	2	0	0	0	1	0	2	1	2	10
22	14	2	2		0	0	1	0	0	0	0	0	2	0	1	0	0	0	2	0	0	6
23	12	2	2		0	1	1	0	0	1	1	0	2	0	1	0	2	0	1	0	1	11
24	13	1	2		0	1	1	0	0	0	1	0	1	1	1	1	0	0	1	0	1	9
25	14	2	2		1	1	2	0	1	2	2	0	1	1	1	1	0	0	2	0	2	17
26	15	2	2		1	2	2	0	0	2	1	1	2	0	2	0	1	0	2	0	1	17
27	13	1	2		1	0	1	1	0	0	1	2	0	0	1	0	1	1	1	1	1	12
29	15	2	2		1	0	0	0	0	0	2	0	0	0	0	0	2	0	0	0	2	7
30	13	1	2		2	1	2	1	1	1	1	1	1	1	1	0	1	1	1	1	2	19
31	15	2	2		1	1	1	0	0	1	1	0	1	0	0	0	0	0	0	0	0	6
32	14	2	2		1	1	1	1	0	0	0	0	1	0	1	0	2	0	1	0	2	11
33	15	1	2		0	1	2	2	1	2	2	0	1	0	2	0	0	0	2	0	2	17
35	12	1	2		1	1	2	1	1	2	1	1	2	1	1	1	1	0	1	0	2	19
38	13	1	2	OD	1	1	1	0	1	1	2	0	2	0	1	1	1	1	2	0	1	16		27	9	3	10	5
39	13	1	2	OD	1	0	2	0	1	0	1	1	0	0	0	1	2	0	0	0	2	11		54	42	0	6	6
40	14	1	2	OD ADHD	1	1	1	0	0	0	1	0	0	0	0	0	2	0	1	0	1	8		42	33	1	3	5
41	14	1	2	OD		0	0	1	1	0	0	1	1	1	0	1	0	1	1	0	2	10		40	24	1	8	7
43	13	2	2	OD OCD Anxiety	0	2	2	2	1	1	1	2	1	1	1	2	1	0	1	0	1	19		42	24	4	6	8
44	15	1	2	OD	1	1	0	2	1	2	0	1	0	2	2	2	1	1	0	2	0	18		66	42	5	8	11
45	14	1	2	OD	1	0	2	0	1	0	0	0	0	0	0	0	2	0	1	0	2	9		40	30	0	7	3
46	12	2	2	OD	1	1	2	1	1	1	2	0	1	1	1	0	0	0	1	0	1	14		63	39	5	9	10
48	15	2	2	OD	1	1	2	0	1	1	1	1	2	1	1	0	1	1	1	0	0	15		43	21	5	11	6
49	12	2	2	ED	2	2	2	2	1	1	2	0	2	1	2	2	2	2	2	1	2	28		85	54	6	13	12
50	13	2	2	SR	1	0	1	1	0	0	1	2	1	1	1	0	0	1	2	0	1	13
51	13	1	2	OD/SR/deconditioning	0	0	1	0	1	1	1	1	0	1	1	1	0	0	1	0	1	10		44	57	6	17	10	4
52	14	2	2	OD(POTS)	1	1	2	0	1	1	2	0	2	1	2	1	0	0	2	0	2	18		62	63	11	20	14	6	26
54	13	1	2	OD tendency/deconditioning	0	0	2	0	0	0	0	1	2	0	0	2	0	1	2	0	2	12		53	66	7	14	12	2	54
55	13	2	2	RAP IBS	1	1	2	0	0	2	1	0	2	0	1	1	1	1	2	0	1	16		40	48	9	16	13	2	33
56	14	2	2	OD(POTS)/sleeping dis	0	1	1	1	1	1	1	1	1	1	1	1	1	1	1	0	1	15		47	57	9	15	12	3	8
57	13	1	2	Tic/SR/ASD and OD tendency	1	0	1	0	1	0	0	1	0	1	0	0	1	1	0	0	1	8		5	27	5	9	8	2	3
58	14	1	2	Obesity/SR	1	1	0	1	2	0	2	1	1	0	2	0	2	0	1	0	2	16		65	69	12	18	12	3	49
59	15	2	2	OD/OCD/sleeping dis/too anxiety	0	2	1	0	1	2	1	1	2	1	1	0	0	1	2	0	1	16		71	75	9	18	15	2	51
60	14	2	2	OD tendency/SR/deconditioning	0	1	2	1	1	1	2	0	1	1	2	1	1	0	2	0	2	18		34	48	8	15	9	3	12
61	13	2	2	OD/SR	0	0	1	0	1	0	1	1	1	1	0	0	0	0	2	0	1	9		22	42	5	10	11	2	12
62	13	1	2	IBS/SR/DD	1	1	2	1	2	1	2	1	1	1	1	1	1	1	1	0	2	20		56	63	8	20	11	4	35
65	12	2	2	SR/Migrane	0	1	1	0	0	2	0	0	1	0	1	0	0	0	2	0	0	8		55	54	11	23	13	6	52
67	13	1	2	FD/SR?Anemia	1	1	1	0	0	0	1	0	0	0	1	0	1	0	2	0	1	9		53	69	6	15	9	2	20
70	14	2	2	SR 便秘	1	1	2	0	1	2	1	0	2	1	2	0	0	1	2	0	1	17		67	69	10	18	16	3	42
71	13	1	2	ADHD ASD OD SR	1	1	2	1	2	1	2	0	2	2	1	2	2	2	1	0	2	24		31	36	9	19	13	3	38
72	13	2	2	睡眠障害 頭痛 OD	2	1	1	2	2	1	2	1	2	1	2	0	1	1	2	0	2	23		70	75	14	10	17	2	71
73	14	1	2	OD SR	0	0	1	0	1	0	0	0	1	2	1	2	1	1	1	0	1	12		69	72	8	18	17	3	18
74	14	2	2	OD SR 便秘	1	1	2	0	1	1	2	1	2	1	1	1	1	1	1	0	2	19		66	75	10	15	12	4	51
75	13	2	2	SR	1	2	2	0	1	1	2	0	1	0	2	1	0	0	2	0	1	16		67	66	12	19	16	6	35
76	14	2	2	SR IBS OD	2	1	2	2	1	2	2	1	2	1	2	2	0	1	2	0	2	25		77	69	14	23	17	2	53
77	13	2	2	OD SR 睡眠障害	1	2	2	1	2	1	2	1	2	1	2	0	0	0	1	1	2	21		70	62	14	23	17	4	66
	13.6±0.9
	0.894722

## Sheet: 患者(小中)（外れ値省き） 
ID	Age	Gender	School	Disgnosis	OD	SR	ADHD	ASD	ED	Insomnia	Obesity	OCD	BMR	Others	1	2	3	4	5	6	7	8	9	10	11	12	13	14	15	16	17	PSCScore	Commentｓ	QTA30 Full	QTA30 physical syn	QTA30 depression	QTA30 self-efficasy	QTA30 anxiety	QTA30 family fun	GHQ
3	11	1	1	ASD ED OCD				1	1			1			0	0	1	1	0	0	1	0	0	1	1	0	0	0	2	0	1	8
4	11	1	1	ADHD			1								2	0	0	0	2	2	2	2	1	1	0	2	2	2	0	1	2	21
5	14	1	2	ADHD OD OCD SR	1	1	1					1			2	1	1	1	1	1	0	0	2	0	1	1	1	0	2	1	1	16
6	14	1	2	ADHD BorderlineMR			1						1		1	0	2	0	1	0	2	1	0	0	0	1	1	1	1	0	2	13
7	11	2	1	ADHD			1								1	2	1	2	1	2	1	1	2	1	2	2	1	1	2	1	2	25
8	14	2	2	Tic SR		1								1	0	1	1	0	0	0	2	0	1	0	0	0	0	0	1	0	2	8
9	14	1	2	OD SR	1	1									1	2	0	1	0	1	1	0	1	0	2	0	1	0	2	0	2	14
11	11	1	1	ASD SR Obesity		1		1			1				0	0	1	1	1	1	1	0	2	0	1	2	0	1	1	0	1	13
12	15	2	2	睡眠障害 ＳＲ		1				1					0	1	1	0	0	2	0	2	0	0	1	1	0	1	2	0	1	12
13	11	1	1	ASD ADD			1	1							0	0	1	0	0	0	1	0	1	0	1	0	1	0	1	0	2	8
14	12	1	1	SR 睡眠障害		1				1					1	1	2	1	2	1	2	0	1	0	1	1	2	0	1	0	2	18
15	13	1	2	Borderline MR ADHD OCD			1					1	1		0	0	2	1	1	1	2	2	0	0	1	1	2	2	2	0	2	19
16	11	1	1	ADHD			1								0	2	1	0	0	1	0	0	2	0	2	1	0	0	1	0	2	12
17	12	1	2	OD SR	1	1									2	1	2	1	0	2	0	1	2	0	2	1	1	1	2	1	1	20
20	14	2	2	OD SR ASD	1	1		1							0	0	2	0	0	0	0	0	2	0	0	0	1	0	2	1	2	10
21	11	1	1	IBS OD SR 頭痛 肥満	1	1					1			1	2	1	0	1	1	2	1	1	1	1	1	1	1	1	2	0	1	18
22	14	2	2	OD	1										0	0	1	0	0	0	0	0	2	0	1	0	0	0	2	0	0	6
23	12	2	2	ED SR		1			1						0	1	1	0	0	1	1	0	2	0	1	0	2	0	1	0	1	11
24	13	1	2	OD SR	1	1									0	1	1	0	0	0	1	0	1	1	1	1	0	0	1	0	1	9
25	14	2	2	OD SR	1	1									1	1	2	0	1	2	2	0	1	1	1	1	0	0	2	0	2	17
26	15	2	2	睡眠障害 SR		1				1					1	2	2	0	0	2	1	1	2	0	2	0	1	0	2	0	1	17
27	13	1	2	OD ADHD	1		1								1	0	1	1	0	0	1	2	0	0	1	0	1	1	1	1	1	12
28	11	1	1	肥満 ASD				1			1				0	1	0	0	1	2	0	1	0	1	0	0	1	0	2	1	2	12
29	15	2	2	OD ED SR	1	1			1						1	0	0	0	0	0	2	0	0	0	0	0	2	0	0	0	2	7
30	13	1	2	ADD(ADHD)			1								2	1	2	1	1	1	1	1	1	1	1	0	1	1	1	1	2	19
31	15	2	2	OD SR PMS	1	1								1	1	1	1	0	0	1	1	0	1	0	0	0	0	0	0	0	0	6
32	14	2	2	OD 睡眠障害 SR	1			1		1				1	1	1	1	1	0	0	0	0	1	0	1	0	2	0	1	0	2	11
33	15	1	2	SR 睡眠障害 便秘 ASD		1		1		1				1	0	1	2	2	1	2	2	0	1	0	2	0	0	0	2	0	2	17
35	12	1	2	ASD 解離				1						1	1	1	2	1	1	2	1	1	2	1	1	1	1	0	1	0	2	19
38	13	1	2	OD SR	1	1									1	1	1	0	1	1	2	0	2	0	1	1	1	1	2	0	1	16		27	9	3	10	5
39	13	1	2	OD SR	1	1									1	0	2	0	1	0	1	1	0	0	0	1	2	0	0	0	2	11		54	42	0	6	6
40	14	1	2	ADHD SR		1	1								1	1	1	0	0	0	1	0	0	0	0	0	2	0	1	0	1	8		42	33	1	3	5
41	14	1	2	OD SR	1	1										0	0	1	1	0	0	1	1	1	0	1	0	1	1	0	2	10		40	24	1	8	7
43	13	2	2	OD OCD 不安障害	1							1		1	0	2	2	2	1	1	1	2	1	1	1	2	1	0	1	0	1	19		42	24	4	6	8
44	15	1	2	OD SR	1	1									1	1	0	2	1	2	0	1	0	2	2	2	1	1	0	2	0	18		66	42	5	8	11
45	14	1	2	OD SR	1	1									1	0	2	0	1	0	0	0	0	0	0	0	2	0	1	0	2	9		40	30	0	7	3
46	12	2	2	OD SR	1	1									1	1	2	1	1	1	2	0	1	1	1	0	0	0	1	0	1	14		63	39	5	9	10
47	11	2	1	OD ＳＲ	1	1									1	2	0	0	1	2	2	1	2	1	2	0	2	0	1	0	2	19
48	15	2	2	OD	1										1	1	2	0	1	1	1	1	2	1	1	0	1	1	1	0	0	15		43	21	5	11	6
49	12	2	2	ED					1						2	2	2	2	1	1	2	0	2	1	2	2	2	2	2	1	2	28		85	54	6	13	12
50	13	2	2	SR OD	1	1									1	0	1	1	0	0	1	2	1	1	1	0	0	1	2	0	1	13
51	13	1	2	OD/SR/deconditioning	1	1									0	0	1	0	1	1	1	1	0	1	1	1	0	0	1	0	1	10		44	57	6	17	10	4
52	14	2	2	OD(POTS)	1										1	1	2	0	1	1	2	0	2	1	2	1	0	0	2	0	2	18		62	63	11	20	14	6	26
54	13	1	2	OD tendency/deconditioning	1										0	0	2	0	0	0	0	1	2	0	0	2	0	1	2	0	2	12		53	66	7	14	12	2	54
55	13	2	2	RAP IBS										1	1	1	2	0	0	2	1	0	2	0	1	1	1	1	2	0	1	16		40	48	9	16	13	2	33
56	14	2	2	OD(POTS)/sleeping dis	1					1					0	1	1	1	1	1	1	1	1	1	1	1	1	1	1	0	1	15		47	57	9	15	12	3	8
57	13	1	2	Tic/SR/ASD and OD tendency	1	1		1						1	1	0	1	0	1	0	0	1	0	1	0	0	1	1	0	0	1	8		5	27	5	9	8	2	3
58	14	1	2	Obesity/SR		1					1				1	1	0	1	2	0	2	1	1	0	2	0	2	0	1	0	2	16		65	69	12	18	12	3	49
59	15	2	2	OD/OCD/sleeping dis/too anxiety	1					1		1		1	0	2	1	0	1	2	1	1	2	1	1	0	0	1	2	0	1	16		71	75	9	18	15	2	51
60	14	2	2	OD tendency/SR/deconditioning	1	1									0	1	2	1	1	1	2	0	1	1	2	1	1	0	2	0	2	18		34	48	8	15	9	3	12
61	13	2	2	OD/SR	1	1									0	0	1	0	1	0	1	1	1	1	0	0	0	0	2	0	1	9		22	42	5	10	11	2	12
62	13	1	2	IBS/SR/DD	1	1								1	1	1	2	1	2	1	2	1	1	1	1	1	1	1	1	0	2	20		56	63	8	20	11	4	35
63	11	2	1	OD/deconditioning	1										1	0	0	0	0	0	2	1	1	0	0	1	1	1	0	0	2	10		39	57	5	13	10	2	3
64	12	1	1	IBS/SR/ADHD		1	1							1	2	2	1	1	1	0	2	2	1	1	0	1	2	1	1	1	2	19		29	39	8	16	12	2	30
65	12	2	2	SR/Migrane		1								1	0	1	1	0	0	2	0	0	1	0	1	0	0	0	2	0	0	8		55	54	11	23	13	6	52
67	13	1	2	OD/SR?Anemia	1	1									1	1	1	0	0	0	1	0	0	0	1	0	1	0	2	0	1	9		53	69	6	15	9	2	20
70	14	2	2	SR 便秘		1								1	1	1	2	0	1	2	1	0	2	1	2	0	0	1	2	0	1	17		67	69	10	18	16	3	42
71	13	1	2	ADHD ASD OD SR	1	1	1	1							1	1	2	1	2	1	2	0	2	2	1	2	2	2	1	0	2	24		31	36	9	19	13	3	38
72	13	2	2	睡眠障害 頭痛 OD	1					1					2	1	1	2	2	1	2	1	2	1	2	0	1	1	2	0	2	23		70	75	14	10	17	2	71
73	14	1	2	OD SR	1	1									0	0	1	0	1	0	0	0	1	2	1	2	1	1	1	0	1	12		69	72	8	18	17	3	18
74	14	2	2	OD SR 便秘	1	1								1	1	1	2	0	1	1	2	1	2	1	1	1	1	1	1	0	2	19		66	75	10	15	12	4	51
75	13	2	2	SR		1									1	2	2	0	1	1	2	0	1	0	2	1	0	0	2	0	1	16		67	66	12	19	16	6	35
76	14	2	2	SR IBS OD	1	1								1	2	1	2	2	1	2	2	1	2	1	2	2	0	1	2	0	2	25		77	69	14	23	17	2	53
77	13	2	2	OD SR 睡眠障害	1	1								1	1	2	2	1	2	1	2	1	2	1	2	0	0	0	1	1	2	21		70	62	14	23	17	4	66
78	11	2	1	OD	1										1	0	0	1	1	0	2	0	0	1	1	0	1	0	0	0	1	9		50	66	7	13	10	2	2
					起立性調節障害	不登校	注意欠陥多動性障害	自閉症スペクトラム障害	摂食障害	睡眠障害	肥満	強迫性障害	境界知能	その他

## Sheet: H中
ID	school	grade	age	PSC score	M/F
2	2	1	12	3	2
3	2	1	12	2	2
4	2	1	12	6	2
6	2	1	12	4	2
7	2	1	12	12	2
8	2	1	12	3	2
9	2	1	13	5	2
10	2	1	12	4	2
12	2	1	13	8	2
16	2	1	12	16	2
17	2	1	12	5	2
18	2	1	13	4	2
19	2	1	12	5	2
20	2	1	13	11	1
21	2	1	12	14	1
22	2	1	12	6	1
23	2	1	13	5	1
25	2	1	12	3	1
28	2	1	12	1	1
30	2	1	13	3	1
31	2	1	12	14	1
32	2	1	12	11	1
34	2	2	13	13	2
36	2	2	13	20	2
37	2	2	14	16	2
38	2	2	14	22	2
41	2	2	14	18	2
42	2	2	13	0	2
43	2	2	13	2	2
44	2	2	14	13	2
45	2	2	14	2	2
46	2	2	13	11	2
47	2	2	13	22	2
49	2	2	14	12	2
50	2	2	13	12	1
53	2	2	13	15	1
54	2	2	13	15	1
55	2	2	14	0	1
56	2	2	13	11	1
58	2	2	14	13	1
60	2	2	13	12	1
61	2	3	14	12	2
62	2	3	15	8	2
63	2	3	15	7	2
65	2	3	14	2	2
66	2	3	15	6	2
67	2	3	14	4	2
68	2	3	14	11	2
69	2	3	14	11	2
70	2	3	15	0	2
71	2	3	14	3	2
72	2	3	14	16	2
73	2	3	15	10	2
74	2	3	14	13	2
75	2	3	14	0	2
76	2	3	14	21	2
77	2	3	14	3	1
78	2	3	14	10	1
79	2	3	14	21	1
80	2	3	14	6	1
81	2	3	14	12	1
82	2	3	15	2	1
83	2	3	15	8	1
84	2	3	15	9	1
			13.4±1.0
			0.99789
